# Supplementary material
Source: Springer Nature journal article supplement (https://www.springermedizin.de/resource/supplementary/12907_2008_66_MOESM3_ESM.pdf/9525038)

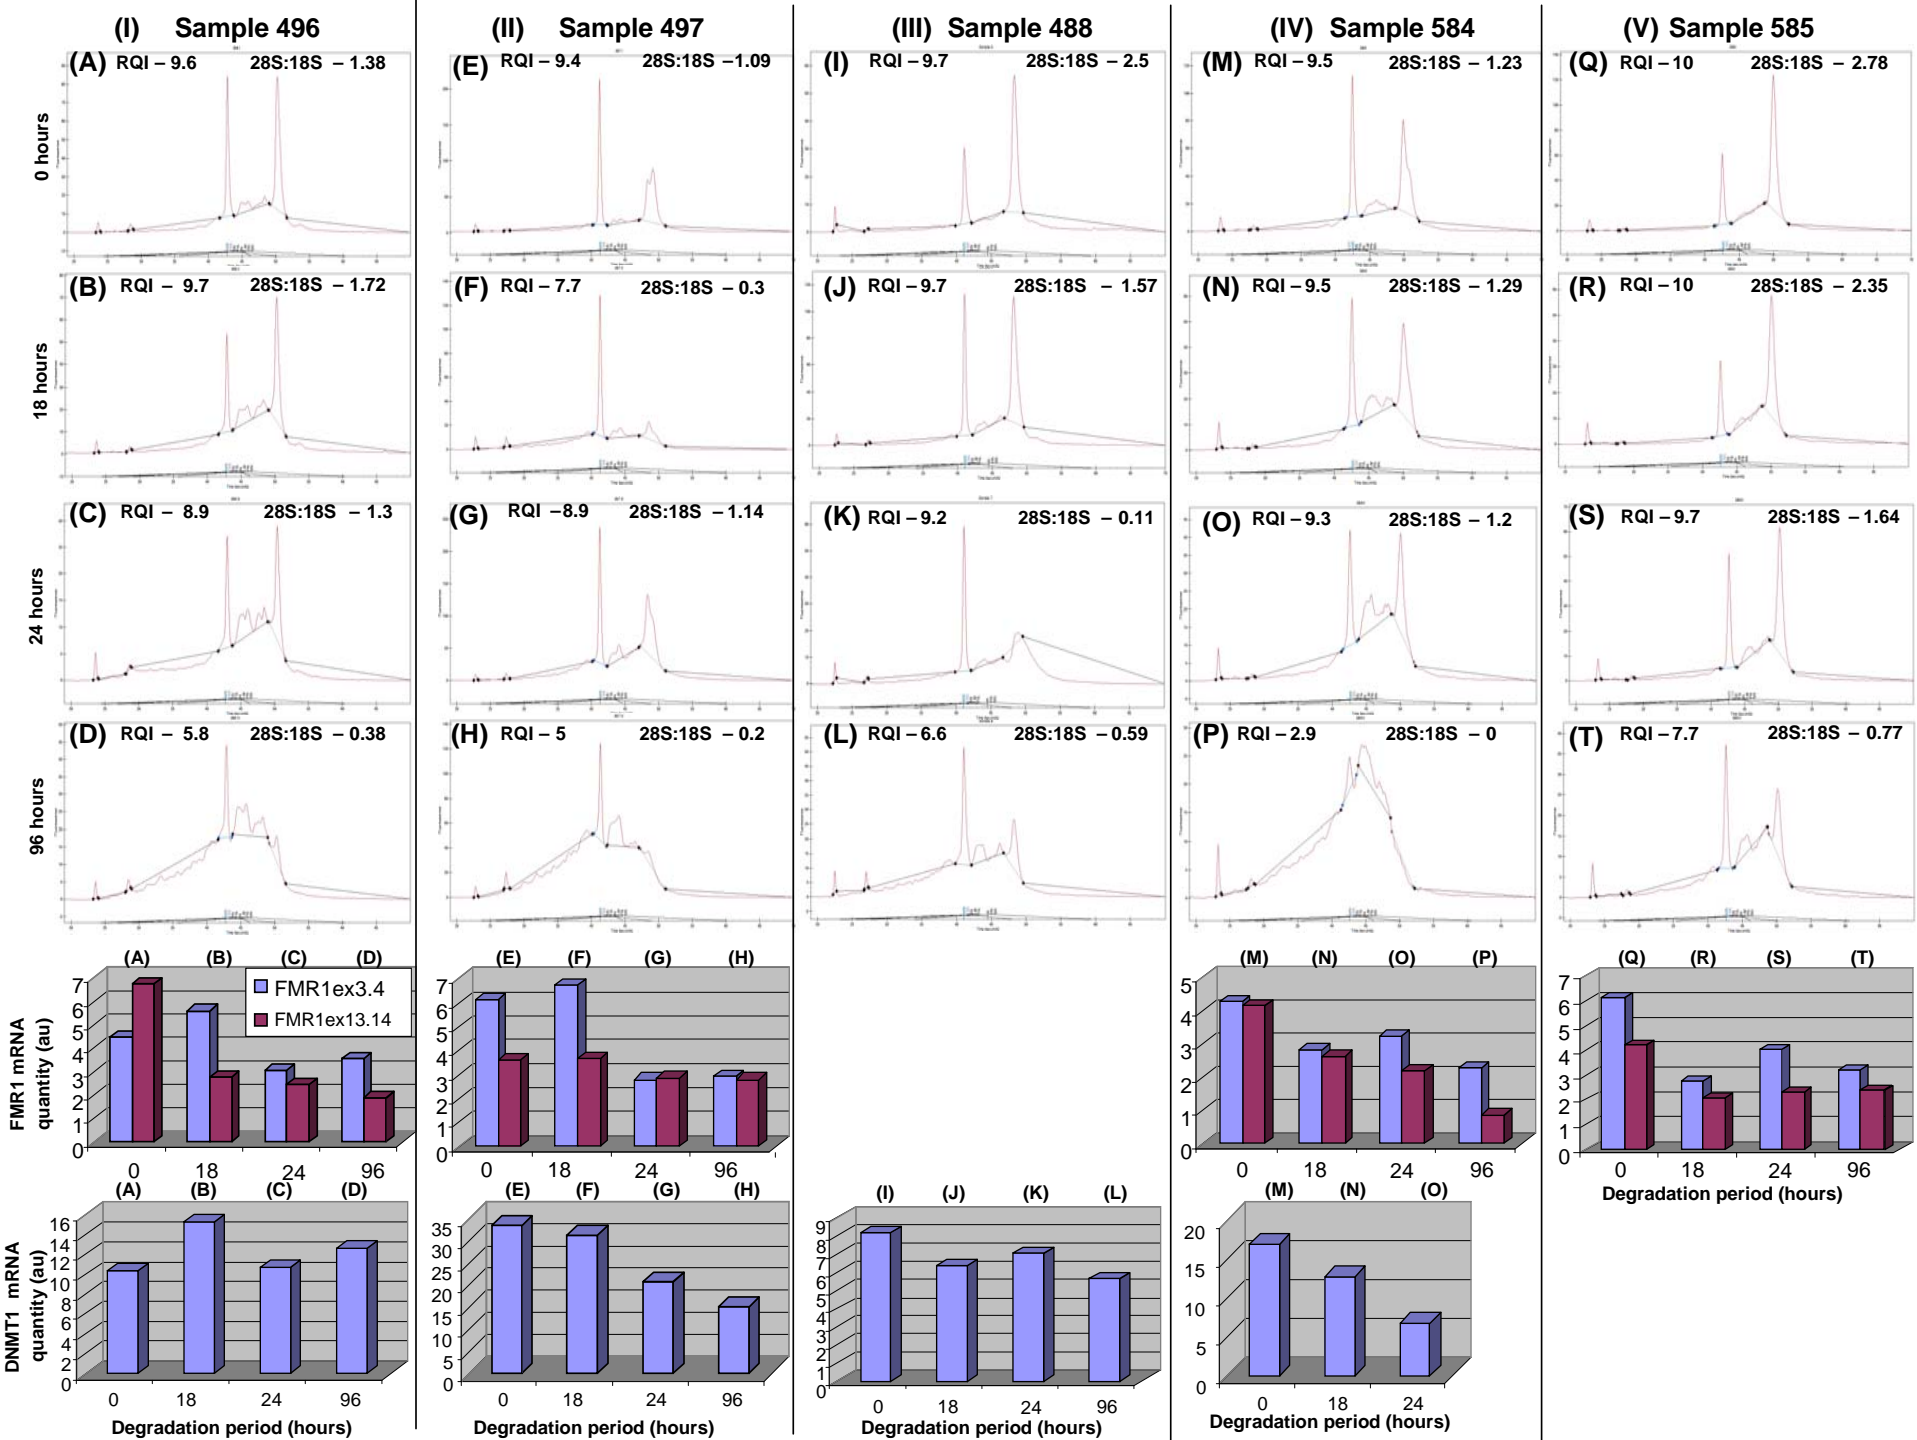

Supplement: MOESM3 [file 9525038]
